# Supplementary material
Source: Springer Nature journal article supplement (https://www.springermedizin.de/resource/supplementary/12990_2010_315_MOESM3_ESM.pdf/9613014)

Extracellular space

Cytoplasm

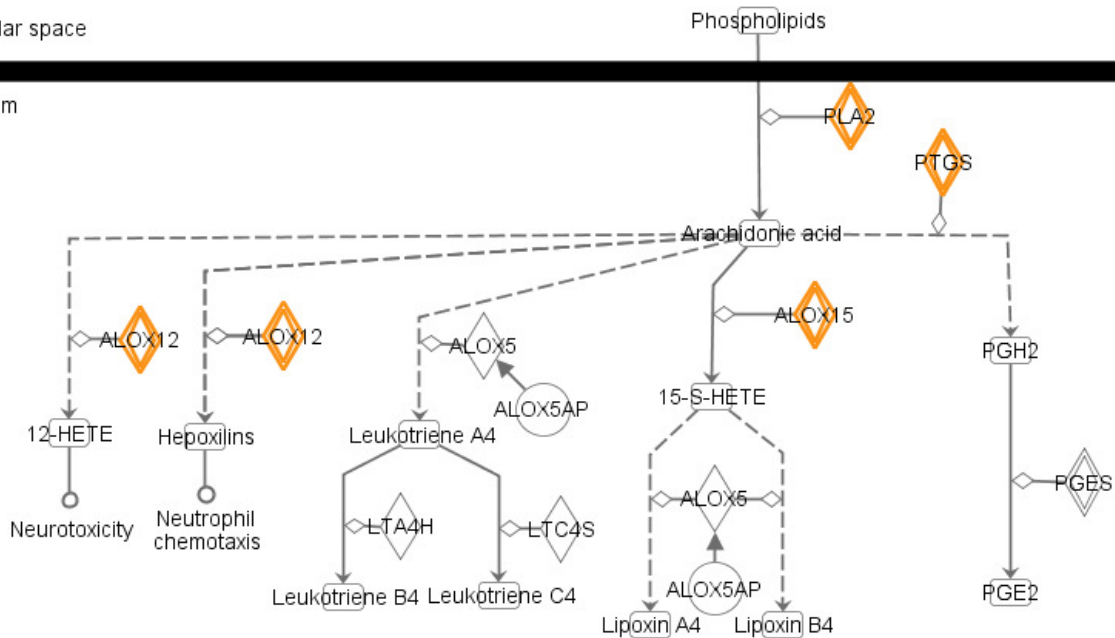

Supplement: MOESM3 [file 9613014]
